# Supplementary material for: Identification of a Plasma Four-microRNA Panel as Potential Noninvasive Biomarker for Osteosarcoma
Source: PLoS One. 2015 Mar 16;10(3):e0121499. doi: 10.1371/journal.pone.0121499 (PMC4361617; doi:10.1371/journal.pone.0121499)
Supplement: S1 Table — (XLS) [file pone.0121499.s002.xls]

## Sheet: Sheet1
Supplementary Table 1. Differentially expressed miRNAs in pre-operative osteosarcoma plasma samples compared to healthy control plasma samples determined by TLDA.
miRNA	Ct of healthy control	Ct of pre-operative osteosarcoma	ΔCt (pre-operative - control)
hsa-let-7e-5p	37.358	25.405	-11.953
hsa-let-7f-5p	39.452	28.4	-11.052
hsa-let-7g-5p	40	28.122	-11.878
hsa-miR-105-5p	40	29.458	-10.542
hsa-miR-107	40	28.133	-11.867
hsa-miR-1262	40	27.314	-12.686
hsa-miR-132-5p	40	31.519	-8.481
hsa-miR-138-5p	37.624	21.162	-16.462
hsa-miR-139-5p	40	22.16	-17.84
hsa-miR-149-5p	40	30.205	-9.795
hsa-miR-152-5p	40	26.405	-13.595
hsa-miR-154-5p	39.518	25.402	-14.116
hsa-miR-15b-3p	40	25.48	-14.52
hsa-miR-183-3p	40	28.11	-11.89
hsa-miR-188-3p	38.258	25.413	-12.845
hsa-miR-190a-5p	40	25.149	-14.851
hsa-miR-192-5p	32.017	24.348	-7.669
hsa-miR-193a-3p	35.439	27.412	-8.027
hsa-miR-195-5p	27.976	17.364	-10.612
hsa-miR-199a-3p	32.984	21.143	-11.841
hsa-miR-199b-5p	40	22.153	-17.847
hsa-miR-200a-3p	40	23.136	-16.864
hsa-miR-200b-3p	40	25.426	-14.574
hsa-miR-203a-3p	40	30.436	-9.564
hsa-miR-208a-3p	40	24.05	-15.95
hsa-miR-20a-5p	33.215	24.207	-9.008
hsa-miR-20b-5p	40	29.407	-10.593
hsa-miR-21-5p	31.944	21.427	-10.517
hsa-miR-22-3p	40	24.147	-15.853
hsa-miR-23a-3p	40	30.345	-9.655
hsa-miR-26a-5p	40	26.39	-13.61
hsa-miR-29a-3p	35.955	23.108	-12.847
hsa-miR-29b-3p	40	31.479	-8.521
hsa-miR-302b-3p	35.283	25.425	-9.858
hsa-miR-320a	40	29.396	-10.604
hsa-miR-324-3p	40	31.175	-8.825
hsa-miR-335-5p	40	30.202	-9.798
hsa-miR-34b-5p	40	31.48	-8.52
hsa-miR-361-5p	39.746	31.504	-8.242
hsa-miR-363-3p	40	30.2	-9.8
hsa-miR-365a-3p	40	27.14	-12.86
hsa-miR-374a-5p	37.043	25.318	-11.725
hsa-miR-423-5p	40	31.502	-8.498
hsa-miR-429	38.745	28.443	-10.302
hsa-miR-431-5p	40	27.383	-12.617
hsa-miR-499-3p	40	25.631	-14.369
hsa-miR-512-5p	40	23.208	-16.792
hsa-miR-521	39.847	26.453	-13.394
hsa-miR-522-3p	40	26.368	-13.632
hsa-miR-598-3p	40	27.135	-12.865
hsa-miR-615-5p	40	31.499	-8.501
hsa-miR-663b	40	28.198	-11.802
hsa-miR-708-5p	40	31.103	-8.897
hsa-miR-93-3p	40	28.137	-11.863
hsa-miR-9-3p	37.684	29.435	-8.249
